# Supplementary material for: A new family of octanuclear Cu4Ln4 (Ln = Gd, Tb and Dy) spin clusters
Source: Royal Society of Chemistry journal article supplement (doi:10.1039/b710755b), 2007-10-18
Supplement: b710755b.pdf [file b710755b.pdf]

Electronic Supplementary Information for Dalton Transactions  
This journal is © The Royal Society of Chemistry 2007

## **A new family of octanuclear $\text{Cu}_4\text{Ln}_4$ ( $\text{Ln} = \text{Gd}, \text{Tb}$ and $\text{Dy}$ ) spin clusters**

**Kerwyn G. Alley, Arindam Mukherjee, Rodolphe Clérac and Colette Boskovic**

### **Supporting Information**

Table S1 Bond valence sum calculations for **1**

Table S2 Bond valence sum calculations for **2**

Fig. S1. Plot of intensity vs  $2\theta/\lambda$  for powder diffraction data for **1**

Fig. S2. Plot of intensity vs  $2\theta/\lambda$  for powder diffraction data for **2**

Table S1.

Bond valence sum calculations for **1**

|     | Cu(I)        | Cu(II)       | Cu(III) |
|-----|--------------|--------------|---------|
| Cu1 | 1.606        | <u>1.837</u> | 2.310   |
| Cu2 | 1.640        | <u>1.811</u> | 2.360   |
|     | Gd(III)      |              |         |
| Gd1 | <u>2.956</u> |              |         |
| Gd2 | <u>2.971</u> |              |         |

Table S2.

Bond valence sum calculations for **2**

|     | Cu(I)        | Cu(II)       | Cu(III) |
|-----|--------------|--------------|---------|
| Cu1 | 1.594        | <u>1.817</u> | 2.291   |
| Cu2 | 1.619        | <u>1.788</u> | 2.331   |
|     | Tb(III)      |              |         |
| Tb1 | <u>2.932</u> |              |         |
| Tb2 | <u>3.004</u> |              |         |

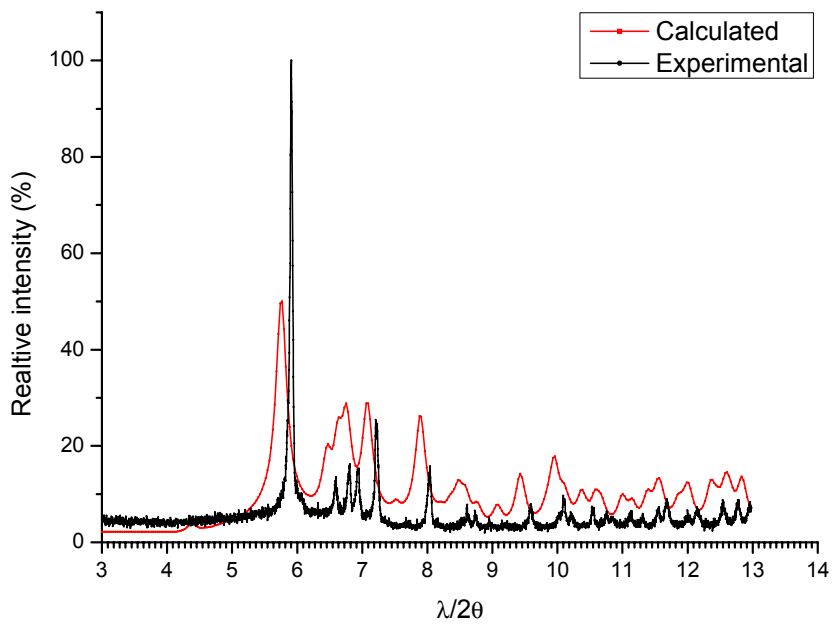

Fig. S1. Plot of intensity vs  $2\theta/\lambda$  for powder diffraction data for **1**.

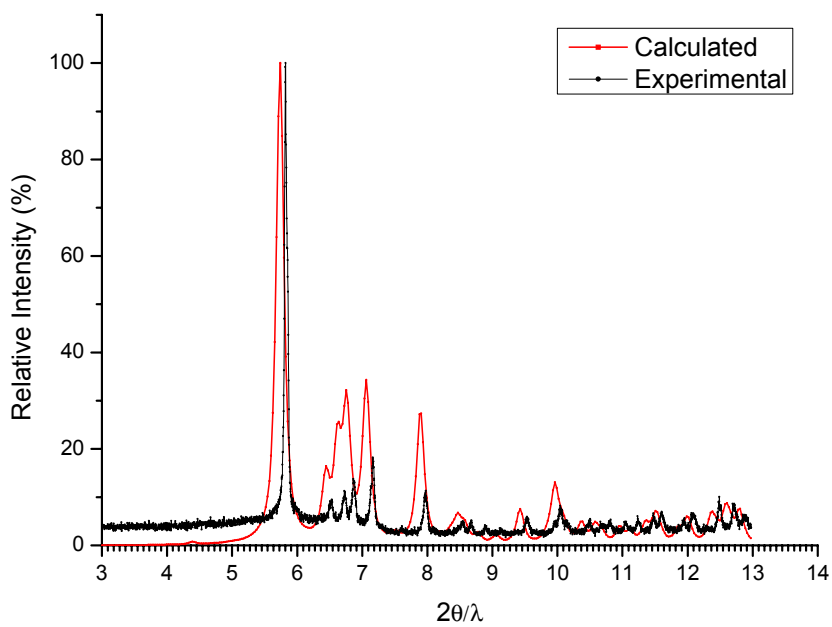

Fig. S2. Plot of intensity vs  $2\theta/\lambda$  for powder diffraction data for **2**.
